# Supplementary material for: Novel Metrics to Characterize In Vitro Pollen Tube Growth Performance of Apple Cultivars
Source: MDPI journal article supplement (doi:10.3390/plants10071460), 2021-07-16
Supplement: s1 [file s1]

# Novel Metrics to Characterize *In Vitro* Pollen Tube Growth Performance of Apple Cultivars

Stefan Roeder <sup>1,2</sup>, Sara Serra <sup>1,2</sup> and Stefano Musacchi <sup>1,2,\*</sup>

## Supplementary Materials

**Table S1.** Characterization of variables (minimum, average, maximum, Q1, Q2, and Q3) based on their correlation, quality of representation and contribution to the first and second dimension at 15 °C and 25 °C.

| Incubation temperature | Variable             | Correlation |        | Representation |        | Total representation | Contribution (%) |        | Total contribution (%) |
|------------------------|----------------------|-------------|--------|----------------|--------|----------------------|------------------|--------|------------------------|
|                        |                      | Dim. 1      | Dim. 2 | Dim. 1         | Dim. 2 |                      | Dim. 1           | Dim. 2 |                        |
| 15 °C                  | minimum              | 0.83        | -0.35  | 0.69           | 0.12   | 0.81                 | 8.9              | 4.0    | 7.5                    |
|                        | average              | 0.88        | -0.47  | 0.77           | 0.22   | 0.99                 | 9.9              | 7.4    | 9.2                    |
|                        | maximum              | 0.75        | -0.53  | 0.56           | 0.28   | 0.84                 | 7.2              | 9.2    | 7.8                    |
|                        | first quartile (Q1)  | 0.88        | -0.44  | 0.77           | 0.2    | 0.97                 | 9.9              | 6.5    | 9.0                    |
|                        | second quartile (Q2) | 0.88        | -0.46  | 0.77           | 0.21   | 0.99                 | 9.9              | 7.1    | 9.1                    |
|                        | third quartile (Q3)  | 0.87        | -0.48  | 0.76           | 0.23   | 0.99                 | 9.7              | 7.6    | 9.1                    |
| 25 °C                  | minimum              | 0.55        | 0.56   | 0.3            | 0.31   | 0.61                 | 3.9              | 10.2   | 5.6                    |
|                        | average              | 0.8         | 0.58   | 0.64           | 0.34   | 0.98                 | 8.2              | 11.2   | 9.1                    |
|                        | maximum              | 0.85        | 0.2    | 0.72           | 0.04   | 0.76                 | 9.3              | 1.3    | 7.0                    |
|                        | first quartile (Q1)  | 0.71        | 0.67   | 0.5            | 0.45   | 0.95                 | 6.4              | 15.0   | 8.8                    |
|                        | second quartile (Q2) | 0.79        | 0.59   | 0.62           | 0.35   | 0.97                 | 7.9              | 11.6   | 9.0                    |
|                        | third quartile (Q3)  | 0.83        | 0.52   | 0.69           | 0.27   | 0.96                 | 8.9              | 9.0    | 8.9                    |

**Table S2.** Pollen tube length related variables (minimum, average, maximum, first, second, and third quartile for 41 individuals incubated at 15 °C and 25 °C.

| ID     | Individual                 | Pollen tube length |     |      |     |     |     |       |      |      |     |      |      | Cluster member-ship (HCPC) |
|--------|----------------------------|--------------------|-----|------|-----|-----|-----|-------|------|------|-----|------|------|----------------------------|
|        |                            | 15 °C              |     |      |     |     |     | 25 °C |      |      |     |      |      |                            |
|        |                            | Min                | Avg | Max  | Q1  | Q2  | Q3  | Min   | Avg  | Max  | Q1  | Q2   | Q3   |                            |
| 1      | Baigent 2020               | 120                | 272 | 483  | 230 | 272 | 311 | 501   | 847  | 1136 | 738 | 856  | 959  | 2                          |
| 2      | Cripps Pink 2019           | 273                | 534 | 853  | 448 | 516 | 628 | 418   | 773  | 1266 | 631 | 763  | 897  | 3                          |
| 3      | Cripps Pink 2020           | 101                | 164 | 283  | 122 | 156 | 190 | 277   | 572  | 795  | 508 | 572  | 640  | 1                          |
| 4      | Dolgo 2019                 | 105                | 351 | 835  | 231 | 344 | 452 | 272   | 601  | 1389 | 468 | 565  | 711  | 1                          |
| 5      | Dolgo 2020                 | 133                | 252 | 430  | 193 | 242 | 296 | 482   | 727  | 1104 | 656 | 728  | 779  | 1                          |
| 7 (A)  | DT2 (Rep 1) 2020           | 129                | 248 | 405  | 198 | 243 | 292 | 535   | 796  | 1053 | 716 | 802  | 865  | 2                          |
| 7 (B)  | DT2 (Rep 2) 2020           | 230                | 378 | 511  | 351 | 386 | 415 | 441   | 783  | 1068 | 704 | 778  | 864  | 2                          |
| 6      | DT2 2019                   | 119                | 412 | 792  | 315 | 415 | 485 | 354   | 609  | 1056 | 504 | 604  | 691  | 1                          |
| 8      | Evereste 2019              | 126                | 387 | 874  | 305 | 362 | 461 | 239   | 509  | 957  | 409 | 501  | 583  | 1                          |
| 9      | Evereste 2020              | 125                | 305 | 532  | 262 | 301 | 350 | 450   | 765  | 1102 | 675 | 756  | 868  | 2                          |
| 10     | Frettingham 2019           | 254                | 700 | 1164 | 583 | 674 | 813 | 637   | 983  | 1638 | 872 | 972  | 1066 | 3                          |
| 11     | Frettingham 2020           | 150                | 335 | 495  | 302 | 338 | 381 | 399   | 917  | 1254 | 824 | 904  | 1016 | 2                          |
| 12     | Golden 2020                | 121                | 220 | 394  | 172 | 210 | 258 | 268   | 657  | 1002 | 591 | 643  | 722  | 1                          |
| 13     | Golden Hornet 2020         | 150                | 378 | 593  | 320 | 364 | 438 | 516   | 909  | 1333 | 823 | 908  | 1006 | 2                          |
| 14     | Granny Smith 2020          | 104                | 215 | 376  | 172 | 212 | 255 | 421   | 649  | 1050 | 556 | 629  | 733  | 1                          |
| 15     | Idared 2020                | 180                | 322 | 572  | 264 | 316 | 375 | 556   | 885  | 1230 | 804 | 880  | 974  | 2                          |
| 16     | Indian Summer 2019         | 200                | 376 | 654  | 308 | 358 | 438 | 438   | 810  | 1489 | 678 | 770  | 937  | 2                          |
| 17     | Indian Summer 2020         | 120                | 304 | 496  | 250 | 295 | 364 | 663   | 919  | 1151 | 848 | 918  | 988  | 2                          |
| 18     | Jarmin 2020                | 183                | 395 | 598  | 321 | 396 | 465 | 499   | 904  | 1373 | 787 | 899  | 1002 | 2                          |
| 19     | JFS KW214MX 2019           | 306                | 562 | 786  | 476 | 558 | 643 | 561   | 901  | 1228 | 806 | 892  | 986  | 3                          |
| 21 (A) | LJ-1000 (Rep 1) 2020       | 124                | 255 | 420  | 198 | 246 | 292 | 406   | 625  | 796  | 577 | 620  | 689  | 1                          |
| 21 (B) | LJ-1000 (Rep 2) 2020       | 107                | 314 | 543  | 239 | 318 | 389 | 640   | 891  | 1169 | 786 | 890  | 987  | 2                          |
| 20     | LJ-1000 2019               | 170                | 361 | 653  | 306 | 349 | 414 | 295   | 578  | 962  | 434 | 582  | 667  | 1                          |
| 22     | Malus floribunda 2019      | 227                | 446 | 823  | 358 | 443 | 526 | 331   | 863  | 1339 | 734 | 851  | 976  | 3                          |
| 23     | Malus floribunda 2020      | 105                | 244 | 432  | 194 | 238 | 282 | 417   | 729  | 1165 | 642 | 729  | 833  | 1                          |
| 24     | Manchurian 2020            | 172                | 347 | 549  | 295 | 346 | 389 | 666   | 910  | 1449 | 826 | 902  | 979  | 2                          |
| 26 (A) | Olsentwo Gala (Rep 1) 2020 | 102                | 257 | 490  | 193 | 234 | 294 | 300   | 552  | 750  | 494 | 550  | 622  | 1                          |
| 26 (B) | Olsentwo Gala (Rep 2) 2020 | 144                | 328 | 501  | 271 | 324 | 382 | 621   | 911  | 1361 | 820 | 915  | 993  | 2                          |
| 25     | Olsentwo Gala 2019         | 307                | 604 | 1010 | 507 | 593 | 704 | 476   | 865  | 1368 | 753 | 852  | 976  | 3                          |
| 28 (A) | Prairifire (Rep 1) 2020    | 127                | 340 | 739  | 251 | 324 | 411 | 537   | 915  | 1227 | 833 | 918  | 997  | 2                          |
| 28 (B) | Prairifire (Rep 2) 2020    | 102                | 230 | 504  | 163 | 211 | 277 | 611   | 932  | 1304 | 842 | 928  | 1019 | 2                          |
| 27     | Prairifire 2019            | 234                | 566 | 986  | 450 | 554 | 656 | 395   | 886  | 1317 | 751 | 894  | 1004 | 3                          |
| 29     | Snowdrift 2019             | 340                | 676 | 1228 | 554 | 655 | 753 | 482   | 954  | 1624 | 793 | 930  | 1089 | 3                          |
| 30     | Snowdrift 2020             | 213                | 432 | 648  | 370 | 420 | 490 | 602   | 1002 | 1485 | 921 | 983  | 1084 | 2                          |
| 31 (A) | WA 38 (Rep 1) 2020         | 127                | 313 | 594  | 260 | 314 | 358 | 676   | 989  | 1283 | 891 | 982  | 1078 | 2                          |
| 31 (B) | WA 38 (Rep 2) 2020         | 128                | 334 | 638  | 236 | 322 | 406 | 656   | 869  | 1286 | 793 | 862  | 942  | 2                          |
| 32     | Winter Gold 2019           | 370                | 623 | 897  | 520 | 624 | 722 | 623   | 993  | 1410 | 885 | 1006 | 1098 | 3                          |
| 33     | Winter Gold 2020           | 106                | 310 | 454  | 266 | 308 | 352 | 492   | 835  | 1362 | 769 | 828  | 899  | 2                          |
| 34     | WSU AxP 2020               | 123                | 254 | 462  | 204 | 246 | 294 | 463   | 767  | 1155 | 674 | 744  | 868  | 2                          |
| 35     | X6114 2019                 | 128                | 423 | 1052 | 312 | 370 | 512 | 425   | 888  | 1323 | 746 | 894  | 1021 | 2                          |
| 36     | X6114 2020                 | 121                | 243 | 451  | 191 | 234 | 283 | 600   | 901  | 1216 | 845 | 902  | 972  | 2                          |

**Table S3.** Pollen tube length related variables (minimum, average, maximum, first, second, and third quartile for 29 individuals incubated at 15 °C and 25 °C.

| Accession | Pollen tube length |     |      |     |     |     |       |     |      |     |     | Cluster    |      |    |
|-----------|--------------------|-----|------|-----|-----|-----|-------|-----|------|-----|-----|------------|------|----|
|           | 15 °C              |     |      |     |     |     | 25 °C |     |      |     |     | membership |      |    |
|           | Min                | Avg | Max  | Q1  | Q2  | Q3  | Min   | Avg | Max  | Q1  | Q2  | Q3         | HCPC | DT |
| Malus 2   | 119                | 300 | 558  | 251 | 280 | 341 | 276   | 497 | 874  | 431 | 490 | 553        | 1    | 1  |
| Malus 3   | 237                | 580 | 923  | 506 | 559 | 658 | 446   | 874 | 1657 | 761 | 864 | 970        | 3    | 3  |
| Malus 5   | 156                | 366 | 700  | 280 | 347 | 437 | 316   | 583 | 837  | 518 | 579 | 637        | 1    | 1  |
| Malus 6   | 292                | 518 | 869  | 453 | 515 | 573 | 348   | 738 | 1058 | 632 | 740 | 840        | 3    | 3  |
| Malus 7   | 276                | 601 | 990  | 528 | 615 | 665 | 510   | 888 | 1372 | 771 | 886 | 1011       | 3    | 3  |
| Malus 8   | 314                | 561 | 927  | 475 | 578 | 626 | 643   | 917 | 1290 | 809 | 901 | 1002       | 3    | 3  |
| Malus 9   | 256                | 533 | 853  | 442 | 508 | 602 | 470   | 942 | 1556 | 801 | 946 | 1035       | 3    | 3  |
| Malus 10  | 258                | 514 | 994  | 429 | 499 | 590 | 600   | 964 | 1549 | 818 | 957 | 1079       | 3    | 3  |
| Malus 11  | 61                 | 312 | 783  | 250 | 305 | 380 | 286   | 549 | 1090 | 449 | 523 | 610        | 1    | 1  |
| Malus 13  | 112                | 231 | 494  | 178 | 217 | 273 | 177   | 435 | 773  | 372 | 437 | 498        | 1    | 1  |
| Malus 14  | 50                 | 247 | 639  | 186 | 241 | 296 | 174   | 362 | 638  | 289 | 344 | 432        | 1    | 1  |
| Malus 15  | 228                | 438 | 767  | 337 | 426 | 526 | 468   | 716 | 1055 | 637 | 717 | 780        | 2    | 1  |
| Malus 16  | 57                 | 407 | 635  | 352 | 406 | 476 | 325   | 671 | 1141 | 547 | 646 | 767        | 1    | 1  |
| Malus 17  | 392                | 708 | 1370 | 586 | 658 | 806 | 505   | 980 | 1451 | 875 | 966 | 1092       | 3    | 3  |
| Malus 19  | 320                | 686 | 1197 | 542 | 661 | 787 | 586   | 958 | 1743 | 813 | 925 | 1061       | 3    | 3  |
| Malus 20  | 189                | 445 | 923  | 340 | 432 | 524 | 422   | 680 | 1120 | 570 | 648 | 764        | 1    | 1  |
| Malus 21  | 211                | 501 | 856  | 384 | 493 | 602 | 327   | 676 | 1108 | 531 | 676 | 810        | 1    | 1  |
| Malus 22  | 64                 | 451 | 838  | 344 | 427 | 546 | 242   | 678 | 1324 | 559 | 658 | 778        | 1    | 1  |
| Malus 23  | 69                 | 415 | 860  | 316 | 414 | 512 | 399   | 833 | 1368 | 687 | 829 | 954        | 2    | 2  |
| Malus 24  | 150                | 491 | 1053 | 361 | 462 | 612 | 67    | 726 | 1442 | 592 | 717 | 871        | 3    | 3  |
| Malus 25  | 93                 | 547 | 1024 | 423 | 566 | 648 | 296   | 746 | 1152 | 602 | 734 | 884        | 3    | 3  |
| Malus 26  | 298                | 521 | 761  | 462 | 523 | 579 | 560   | 939 | 1356 | 806 | 942 | 1028       | 3    | 3  |
| Malus 27  | 143                | 349 | 637  | 289 | 343 | 401 | 313   | 552 | 939  | 488 | 563 | 614        | 1    | 1  |
| Malus 28  | 167                | 400 | 721  | 288 | 391 | 487 | 360   | 752 | 1264 | 628 | 725 | 867        | 2    | 2  |
| Malus 30  | 364                | 640 | 1072 | 538 | 637 | 722 | 520   | 976 | 1368 | 885 | 950 | 1088       | 3    | 3  |
| Malus 31  | 103                | 212 | 458  | 164 | 199 | 241 | 329   | 622 | 892  | 542 | 631 | 703        | 1    | 1  |
| Malus 32  | 273                | 452 | 849  | 389 | 433 | 497 | 515   | 898 | 1442 | 771 | 882 | 1027       | 3    | 3  |
| Malus 33  | 111                | 502 | 1070 | 389 | 477 | 573 | 593   | 862 | 1262 | 747 | 849 | 969        | 3    | 3  |
| Malus 35  | 66                 | 204 | 474  | 137 | 194 | 248 | 516   | 835 | 1238 | 743 | 833 | 920        | 2    | 2  |
